# Supplementary material for: Identification of Lactobacillus from the Saliva of Adult Patients with Caries Using Matrix-Assisted Laser Desorption/Ionization Time-Of-Flight Mass Spectrometry
Source: PubMed Central journal article supplement (PMC4148440; doi:10.1371/journal.pone.0106185), 2014-08-28
Supplement: pone.0106185.s001.pdf [file pone.0106185.s001.pdf]

## **Supplementary**

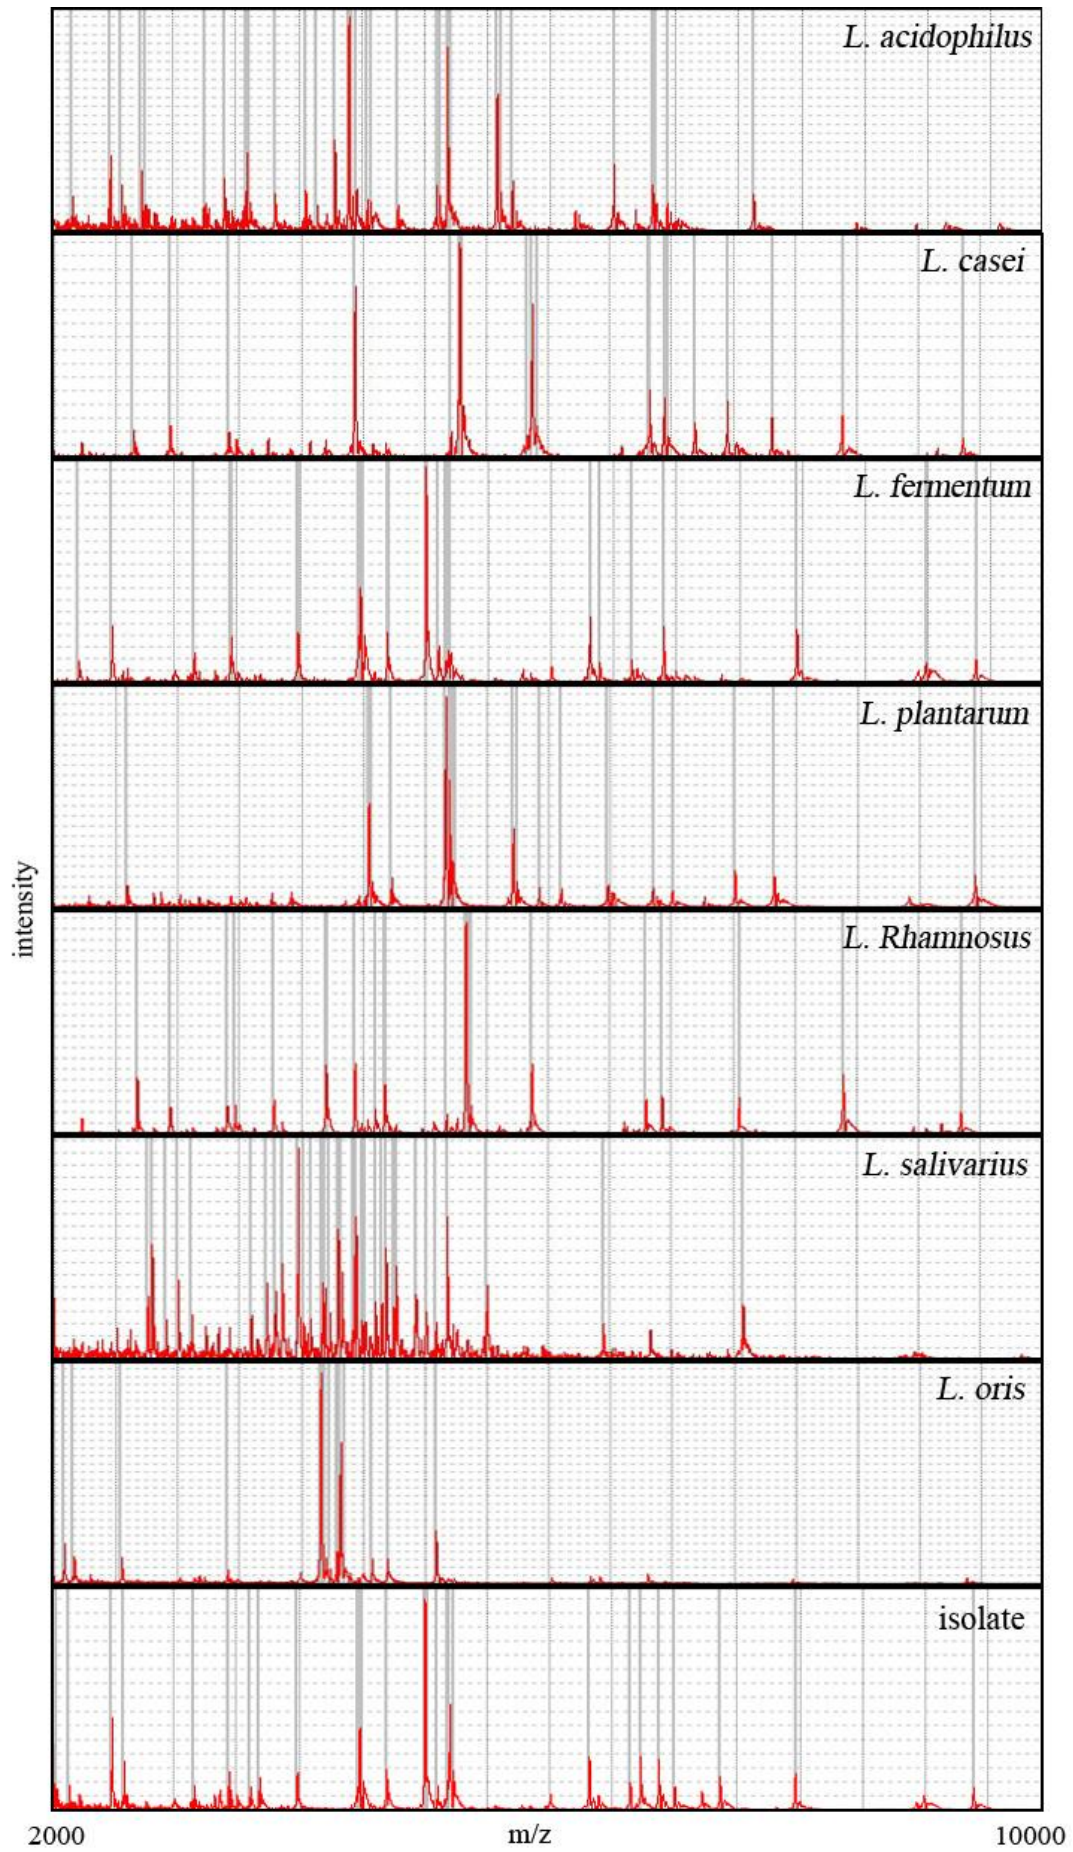

Figure S1: Comparison of seven *Lactobacillus* reference species (*L. acidophilus* ATCC 4356, *L. casei* ATCC 334, *L. fermentum* ATCC 14931, *L. oris* ATCC 49062, *L. plantarum* ATCC 8014, *L. rhamnosus* ATCC 7469, and *L. salivarius* ATCC 11741) with a *Lactobacillus* isolate derived from carious subjects' saliva.
